# Supplementary material for: The Influence of Nitrogen Flow Rate on the Structure and Properties of Mo-Hf-Y-Si-B-N Coatings
Source: MDPI journal article supplement (doi:10.3390/jcs7060253), 2023-06-17
Supplement: s1 [file s1]

Archive with 1 entries (1 files):
- jcs-2326562-supplementary.pdf
