# Supplementary material for: The Influence of Nitrogen Flow Rate on the Structure and Properties of Mo-Hf-Y-Si-B-N Coatings
Source: MDPI journal article supplement (doi:10.3390/jcs7060253), 2023-06-17
Supplement: s1 [file s1 › jcs-2326562-supplementary.pdf]

Supplementary material 1

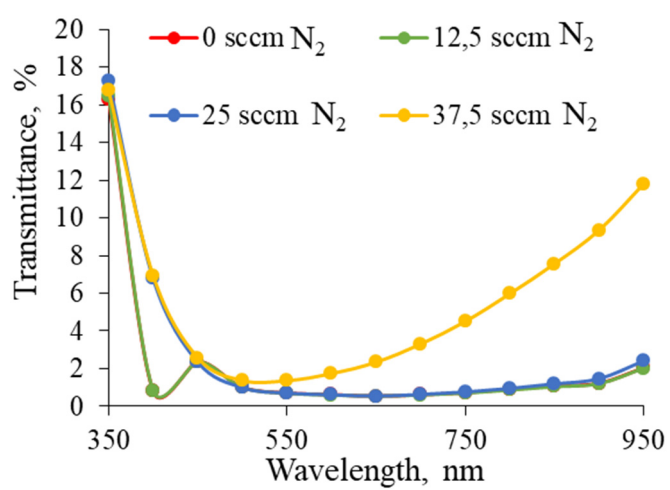

S.1 Dependence of the transmittance of Mo-Hf-Y-Si-B-N coatings on the nitrogen flow rate

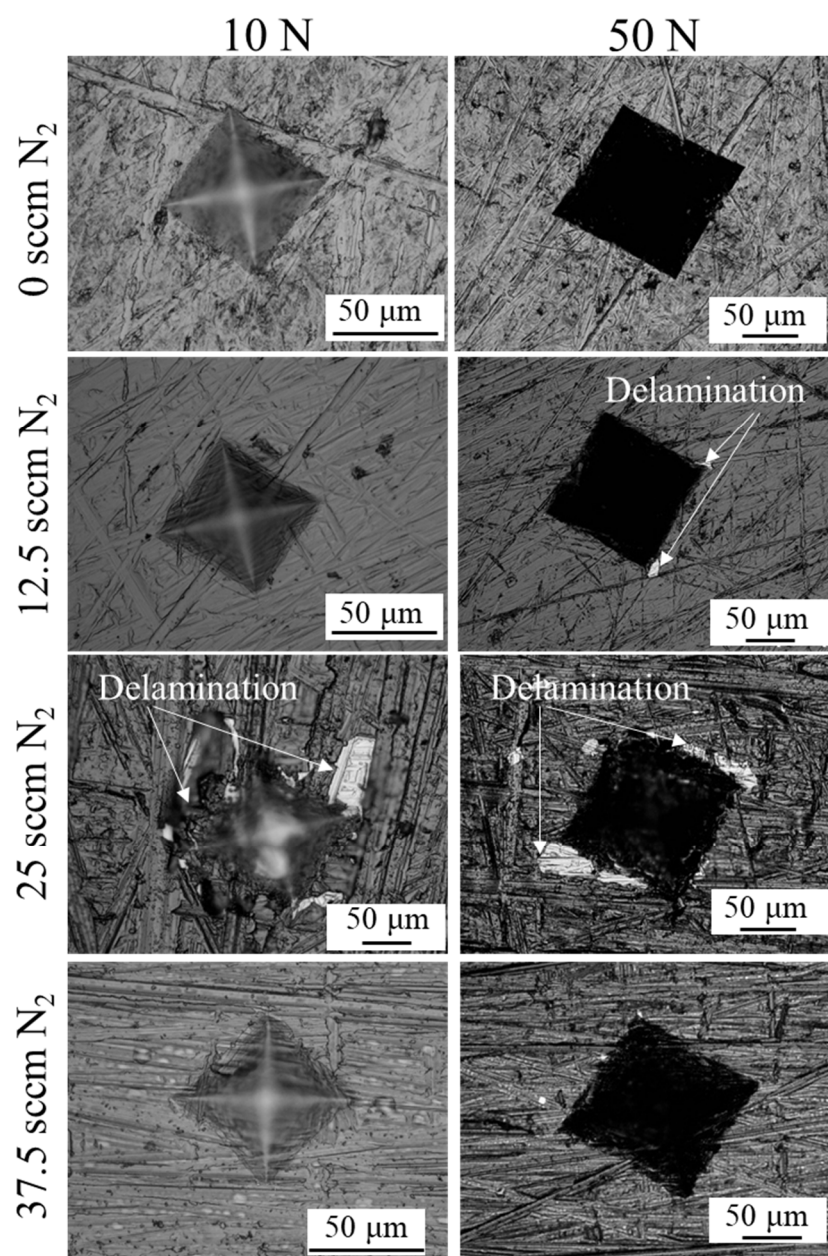

S2. Micrographs of indentations after mechanical testing of Mo-Hf-Y-Si-B-N coatings at loads of 10N and 50 N
